# Supplementary material for: RNA-sequencing elucidates the regulation of behavioural transitions associated with the mating process in honey bee queens
Source: PubMed Central journal article supplement (PMC4521450; doi:10.1186/s12864-015-1750-7), 2015-07-31
Supplement: 12864_2015_1750_MOESM6_ESM.pdf [file 12864_2015_1750_MOESM6_ESM.pdf]

Additional file 6. Genes involved in eye development and visual perception that were differentially expressed between treatments in our study.

| Gene name                                        | Symbol       | Gene function                                                                                   | Reference |
|--------------------------------------------------|--------------|-------------------------------------------------------------------------------------------------|-----------|
| <i>Arrestin 2</i>                                | <i>Arr2</i>  | works with rhodopsins in the maintenance of photoreceptor                                       | [1]       |
| <i>Calphotin</i>                                 | <i>Cpn</i>   | involved in the development of the rhabdomeres                                                  | [2]       |
| <i>chaoptin</i>                                  | <i>chp</i>   | involved in the development of the rhabdomeres                                                  | [3]       |
| <i>G protein beta-subunit 76C</i>                | <i>Gp76C</i> | responsible for terminating the active state of light response signalling cascade               | [4]       |
| <i>neither inactivation nor afterpotential A</i> | <i>ninA</i>  | required for the biogenesis of rhodopsins                                                       | [5]       |
| <i>neither inactivation nor afterpotential C</i> | <i>ninaC</i> | encodes a rhabdomere specific protein and is required to prevent retinal degeneration           | [6]       |
| <i>no receptor potential A</i>                   | <i>norpA</i> | stimulated by light, contributes to the rapid temporal response of photoreceptor cells          | [7]       |
| <i>Rhodopsin 2</i>                               | <i>Rh2</i>   | one of the four ocellar visual pigments in the major class of photoreceptor cells of the retina | [5]       |

## References

- Orem NR, Xia L, Dolph PJ: **An essential role for endocytosis of rhodopsin through interaction of visual arrestin with the AP-2 adaptor.** *Journal of cell science* 2006, 119(15):3141-3148.
- Yang Y, Ballinger D: **Mutations in calphotin, the gene encoding a *Drosophila* photoreceptor cell-specific calcium-binding protein, reveal roles in cellular morphogenesis and survival.** *Genetics* 1994, 138(2):413-421.
- Zelhof AC, Hardy RW, Becker A, Zuker CS: **Transforming the architecture of compound eyes.** *Nature* 2006, 443(7112):696-699.
- Dolph PJ, Man-Son-Hing H, Yarfitz S, Colley NJ, Running Deer J, Spencer M, Hurley JB, Zuker CS: **An eye-specific G[beta] subunit essential for termination of the phototransduction cascade.** *Nature* 1994, 370(6484):59-61.
- Zuker CS: **The biology of vision of *Drosophila*.** *Proceedings of the National Academy of Sciences* 1996, 93(2):571-576.
- Porter JA, Montell C: **Distinct roles of the *Drosophila* ninaC kinase and myosin domains revealed by systematic mutagenesis.** *The Journal of cell biology* 1993, 122(3):601-612.
- Deer JLR, Hurley JB, Yarfitz SL: **G protein control of *Drosophila* photoreceptor phospholipase C.** *Journal of Biological Chemistry* 1995, 270(21):12623-12628.
